# Supplementary material for: Invitation Cards during Pregnancy Enhance Male Partner Involvement in Prevention of Mother to Child Transmission (PMTCT) of Human Immunodeficiency Virus (HIV) in Blantyre, Malawi: A Randomized Controlled Open Label Trial
Source: PubMed Central journal article supplement (PMC4348422; doi:10.1371/journal.pone.0119273), 2015-03-03
Supplement: pone.0119273.s002.pdf [file pone.0119273.s002.pdf]

## **Informed Consent Form For Females**

**College of Medicine, Department of Community Health**

### **Informed Consent Document- Antenatal Woman Enrollment Consent Form**

---

**Study Title:** Feasibility of Male Involvement in Prevention of Mother to Child Transmission of HIV Services in Blantyre, Malawi.

**Principal Investigator:** Alinane L.M. Nyondo, RN,BN-AP, MN-CH

**PI Version Date:** 14 May 2013

---

#### **What you should know about this study**

You are being asked to join a research study. This consent form explains the research study and your part in the study. Please read it carefully and take as much time as you need. Please note that your participation in this study is entirely voluntary and you may decide not to take part or to withdraw from this study at any time. There will be no penalty if you decide to quit the study. During the study, we will tell you if we learn any new information that might affect whether you wish to continue to be in the study or not.

This study is being done in fulfillment of a doctorate degree in Public Health at the College of Medicine in Blantyre, Malawi. The Investigator of this study is Alinane Nyondo. Before you decide if you want to be a part of this study, we want you to understand the study.

The study staff will talk with you about this information. You are free to ask questions about this study at any time. Before you decide whether to take part in this research study, you need to know the purpose, the possible risks and benefits to you, and what will be expected of you during the study. After the study has been fully explained to you, you can decide whether or not you want to participate. Once you understand this study, and if you agree to take part, you will be asked to sign this consent form or make your mark in front of someone. You will be offered a copy of this form to keep.

#### **Purpose of research Study**

The purpose of this study is to see if using an invitation card as a strategy for MI in PMTCT increases the uptake of the PMTCT services by men and women. Women will be randomly allocated to a group that uses an invitation card or a group that does not use an invitation card. This study will compare the proportion of men accompanying their partners/wives for PMTCT services in the group that uses the strategy with the proportion of men that accompany their wives/partners in the group that is not using the strategy. This study will also assess the rates in uptake of PMTCT services and compliance with PMTCT specific education where necessary in women in both study groups.

#### **Procedures**

If you agree to join this study, you will either be randomly assigned to the group that uses the invitation card as a strategy for MI of PMTCT or the group that follows the standard of care whereby by a woman is asked by word of mouth to extend an invitation to her invite her husband. You will be asked to come back to the clinic at Study week 2 and 6. You will have a total of 2 follow up visits. During the study visits we will ask you to answer a few questions about yourself such as your age, your health, uptake of PMTCT services. Study staff will abstract any relevant information on your health from your health passport book. About 462 pregnant women will take part in the study.

## **Informed Consent Form For Females**

**College of Medicine, Department of Community Health**

### **Informed Consent Document- Antenatal Woman Enrollment Consent Form**

---

#### **Risks and or discomforts**

We do not anticipate major risk. Some questions may be sensitive however we would like you to answer them because it will help us to understand the best way to handle MI in PMTCT. Your visits here will take place in private. Asking you to inform your partner on PMTCT services or to invite him for PMTCT services may cause him to treat you unfairly, however every effort will be made to minimize potential harm in such instances. We will make every effort to protect your privacy and confidentiality while you are in the study and will not use your name in the study summaries.

#### **Potential Benefits**

There may be no direct benefit to you from this study, but the information we collect may help the government improve the way it delivers health care to other women and their partners in PMTCT services in the future.

#### **Reasons why you may be withdrawn from the study without your consent**

You may be removed from the study without your consent for the following reasons:

- The study is stopped or cancelled by the Malawi Ministry of Health, the Malawi College of Medicine Research Ethics Committee.
- Staying in the study would be harmful to you.
- You are not able to attend study visits or complete the study procedures

#### **Costs and Compensation**

There will be no cost to you for study-related visits. At the end of each visit, you will receive reimbursement for transport to and from the clinic. If you choose not to take part in this study, it will have no effect on your regular health care at this hospital.

#### **Confidentiality**

Efforts will be made to keep your study records and test results confidential to the extent permitted by law. However, we cannot guarantee absolute confidentiality. You will be identified by a code, and personal information from your records will not be released without your written permission except to health care providers when needed. Any publication of this study will not use your name or identify you. However, your records may be reviewed by study staff, study monitors, the Malawi Ministry of Health, and the Malawi College of Medicine Research Ethics Committee (COMREC). All study documents will be stored in locked cabinets in the study clinic and at the College of Medicine. The database will be maintained in a password protected computer with access limited to the study team only. All the consent forms and study records will be destroyed after all academic purposes have been met.

#### **Research Related Injury**

It is unlikely that you will be injured as a result of being in this study, however if you are injured as a result of being in this study, the study staff will give you immediate necessary treatment for your injuries. You will

## **Informed Consent Form For Females**

**College of Medicine, Department of Community Health**

### **Informed Consent Document- Antenatal Woman Enrollment Consent Form**

---

not have to pay for this treatment. You will then be told where you can get additional treatment for your injuries, if needed. There is no program for monetary compensation or other forms of compensation for such injuries through this study. You do not give up any legal rights by signing this consent form.

#### **Problems or Questions**

For questions about this study or a research-related injury, contact:

- Alinane Linda Nyondo, Principal Investigator
- Located at the College of Medicine, Department of Community Health, phone 0888 202 670

For questions about your rights as a research subject, contact:

- The Secretariat, College of Medicine Research Ethics Committee
- Located at the Malawi College of Medicine, phone 01-874-377

**Informed Consent Form For Females**

**College of Medicine, Department of Community Health**

**Informed Consent Document- Antenatal Woman Enrollment Consent Form**

---

**SIGNATURE PAGE:**

**MI in PMTCT STUDY Version 3.0 dated 14 May 2013**

If you have read the informed consent, or have had it read and explained to you, and understand the information, and you voluntarily agree to join the study, please sign your name or make your mark below.

\_\_\_\_\_  
Participant Name (print)

\_\_\_\_\_  
Participant Signature or thumbprint

\_\_\_\_\_  
Date

\_\_\_\_\_  
Study Staff Conducting  
Consent Discussion (print)

\_\_\_\_\_  
Study Staff Signature

\_\_\_\_\_  
Date

\_\_\_\_\_  
Witness Name (print)  
(As appropriate)

\_\_\_\_\_  
Witness Signature

\_\_\_\_\_  
Date
