# Supplementary material for: Invitation Cards during Pregnancy Enhance Male Partner Involvement in Prevention of Mother to Child Transmission (PMTCT) of Human Immunodeficiency Virus (HIV) in Blantyre, Malawi: A Randomized Controlled Open Label Trial
Source: PubMed Central journal article supplement (PMC4348422; doi:10.1371/journal.pone.0119273), 2015-03-03
Supplement: pone.0119273.s004.pdf [file pone.0119273.s004.pdf]

**Appendix 1- Invitation Card**

---

**College of Medicine - Blantyre DHO  
South Lunzu and Mpemba Health Centres**

To: (Partners' PID) \_\_\_\_\_

Your wife is accessing antenatal care at \_\_\_\_\_ Health Centre. We kindly ask you to accompany her at her next antenatal visit on \_\_\_\_\_ so that we counsel both of you on her care while pregnant.

If you have any questions please call Ms Alinane Nyondo on this number 0888-202-670/ 0999 44 1212 or ask a Nurse at \_\_\_\_\_ Health Centre
